# Supplementary material
Source: publisher figshare collection journal article supplement (https://acs.figshare.com/ndownloader/files/4650367)
Supplement: Supplementary file 1 [file 4650367]

Authors: Corrie Clark, Peter Adriaens, F. Brian Talbot

Manuscript title: Green Roof Valuation: A Probabilistic Economic Analysis of Environmental Benefits

Number of pages: 4

**Figure S1.** Distribution of nitrogen oxide uptake per area.

**Table S1.** Municipal stormwater fees per area of impervious surface.

**Table S2.** Net present value for model framework.

**Table S1.** Municipal stormwater fees per area of impervious surface.

| City        | State | Annual Rate<br>(2006\$/m <sup>2</sup> ) | Green Roof Benefit | Notes                                                                                       | Source |
|-------------|-------|-----------------------------------------|--------------------|---------------------------------------------------------------------------------------------|--------|
| Ann Arbor   | MI    | 0.37                                    | --                 | 2006 Stormwater fees. New 2007 policy evaluated separately.                                 | (36)   |
| Atlanta     | GA    | 0.08                                    | --                 | Rate applies to Gwinnett County                                                             | (37)   |
| Bellevue    | WA    | 0.09-0.38                               | --                 | Varies according to degree of imperviousness.                                               | (38)   |
| Boulder     | CO    | 0.06-0.08                               | --                 | Residential rates based on parcel size.                                                     | (39)   |
| Gainesville | FL    | 0.35                                    | --                 |                                                                                             | (40)   |
| Minneapolis | MN    | 0.06-0.09                               | 50%                | 50% reduction for control of 10-year, 24 hr storm. 100% for control of 100-yr, 24 hr storm. | (22)   |
| Portland    | OR    | 0.07                                    | 35%                | 35% fee reduction.                                                                          | (41)   |
| Seattle     | WA    | 0.04-0.36                               | --                 | Varies according to degree of imperviousness.                                               | (42)   |
| Takoma      | WA    | 0.21                                    | --                 |                                                                                             | (43)   |
| Washington  | DC    | 0.03                                    | --                 | Residential rate used.                                                                      | (44)   |

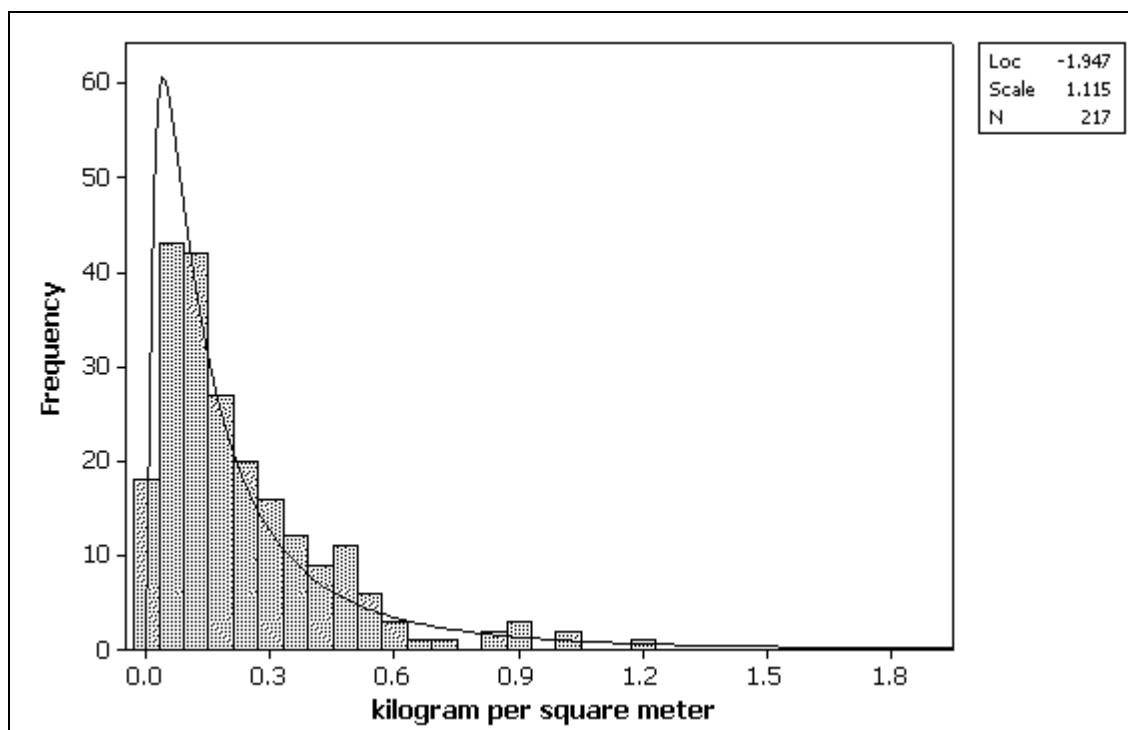

**Figure S1.** Distribution (frequency) of assumed annual NO<sub>x</sub> uptake potentials (kg/m<sup>2</sup>) from 217 plant taxa under green house conditions (32).

**Table S2.** Net present value for model framework.

Conventional roof installation and replacement net present value

$$NPV_{\text{conventional}} = C_{\text{installation}} + \sum_{n=20,40} \frac{C_{\text{replacement}}}{(1+i_d)^n} \cdot (1+i_f)^n$$

Green roof installation net present value

$$NPV_{\text{green roof}} = C_{\text{installation}}$$

Net present value of benefits due to reduced stormwater fees

$$NPV_{\text{stormwater}} = \sum_n \frac{C_{\text{stormwater}}}{(1+i_d)^n} \cdot (1+i_f)^n$$

Net present value of benefits due to reduced energy consumption

$$NPV_{\text{energy savings}} = \sum_n \frac{C_{\text{energy savings}}}{(1+i_d)^n} \cdot (1+i_f)^n$$

Net present value of benefits due to improved air quality

$$NPV_{\text{air pollution}} = \sum_n \frac{C_{\text{air pollution}}}{(1+i_d)^n} \cdot (1+i_f)^n$$

where  $n$  is number of years,  $i_d$  is discount rate, and  $i_f$  is the inflation rate.
